# Supplementary material for: A reversible pressure-induced bond rearrangement of flexible lanthanide 2,5-bis(allyloxy)terephthalate coordination polymer networks
Source: Royal Society of Chemistry journal article supplement (doi:10.1039/d2ce00499b), 2022-01-01
Supplement: d2ce00499b1.pdf [file d2ce00499b1.pdf]

# A reversible pressure-induced bond rearrangement of flexible lanthanide 2,5-bis(allyloxy)terephthalate coordination polymer networks.

L. R. Hunter,<sup>\*a</sup> J. D. Sellars<sup>b,c</sup> and M. R. Probert<sup>a\*</sup>

a. Department of Chemistry, School of Natural and Environmental Sciences, Newcastle University, Newcastle upon Tyne, NE1 7RU, UK

b. Biosciences Institute, Faculty of Medical Sciences, Newcastle University, Newcastle upon Tyne NE2 4HH, UK

c. School of Pharmacy, Faculty of Medical Sciences, King George VI Building, Newcastle upon Tyne NE1 7RU, UK a-

## Supplementary Information

### Synthesis of 2,5-bis(allyloxy)terephthalic acid

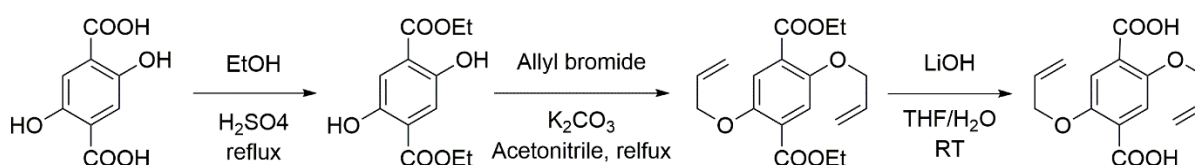

### Synthesis of diethyl 2,5-dihydroxyterephthalate

To a solution of 2,5-dihydroxyterephthalic acid (1 g, 5 mmol) in ethanol (20 mL) 5-10 drops of c. H<sub>2</sub>SO<sub>4</sub> were added carefully. The solution was stirred and heated under reflux for 12h. When cooling the solution, a yellow solid precipitated, that was collected by filtration and washed with ethanol to afford the title compound as a bright yellow solid (1.1 g, 88 %);  $\delta_{\text{H}}$  (300 MHz, CDCl<sub>3</sub>) 10.14 (2H, s, Ar-OH), 7.51 (2H, s, Ar-H), 4.43 (4H, q, *J* 7, Ar-CO<sub>2</sub>CH<sub>2</sub>CH<sub>3</sub>), 1.43 (6H, t, *J* 7, Ar-CO<sub>2</sub>CH<sub>2</sub>CH<sub>3</sub>); all data agrees with that given in the literature.<sup>1</sup>

### Synthesis of diethyl 2,5-bis(allyloxy)terephthalate

Allyl bromide (3 mL, 18 mmol), diethyl 2,5-dihydroxyterephthalate (0.5 g, 2 mmol) and potassium carbonate (1 g, 8 mmol) were added to acetonitrile (10 mL) and refluxed for 12h under nitrogen. Excess solvent was removed under vacuum and the remaining residue diluted with water before extraction into ethyl acetate. Organics were dried with MgSO<sub>4</sub> and concentrated to afford a crude product as pale orange waxy residue. The crude product was passed through a silica plug with *n*-hexane:ethyl acetate [3:1] before being concentrated under vacuum to afford the title compound as a yellow waxy solid (420 mg, 57 %);  $\delta_{\text{H}}$  (300 MHz, CDCl<sub>3</sub>) 7.36 (2H, s, Ar-H), 6.12-6.00 (2H, m, Ar-OCH<sub>2</sub>CH), 5.52-5.44 (2H, m, Ar-OCH<sub>2</sub>CH=CHH), 5.32-5.27 (2H, m, Ar-OCH<sub>2</sub>CH=CHH), 4.60-4.58 (4H, m, ArOCH<sub>2</sub>), 4.41-4.34 (4H, q, *J* 7, Ar-CO<sub>2</sub>CH<sub>2</sub>CH<sub>3</sub>), 1.41-1.36 (6H, t, *J* 7, Ar-CO<sub>2</sub>CH<sub>2</sub>CH<sub>3</sub>); all data agrees with that given in the literature.<sup>1</sup>

### Synthesis of 2,5-bis(allyloxy)terephthalic acid

Three equivalents of LiOH were added to diethyl 2,5-bis(allyloxy)terephthalate (0.4 g, 1.2 mmol) in equal parts THF:H<sub>2</sub>O (10 mL) and stirred overnight at room temperature. Solvents were removed by rotary evaporation and the remaining residue diluted with H<sub>2</sub>O. The solution was neutralised using 1M HCl to a pH of ~ 2 to precipitate the product. The precipitate was filtered to afford the title compound as a white solid (0.32 g, 97 %);  $\delta_{\text{H}}$  (300 MHz, DMSO-*d*<sub>6</sub>) 13.00 (2H, bs, CO<sub>2</sub>H), 7.30 (2H, s, Ar-H), 6.08-5.95 (2H, m, Ar-OCH<sub>2</sub>CH), 5.47-5.40 (2H, m, Ar-OCH<sub>2</sub>CH=CHH), 5.27-5.22 (2H, m, Ar-OCH<sub>2</sub>CH=CHH), 4.61-4.59 (4H, m, ArOCH<sub>2</sub>); all data agrees with that given in the literature.<sup>1</sup>

### <sup>1</sup>H NMR Spectra of synthesised compounds

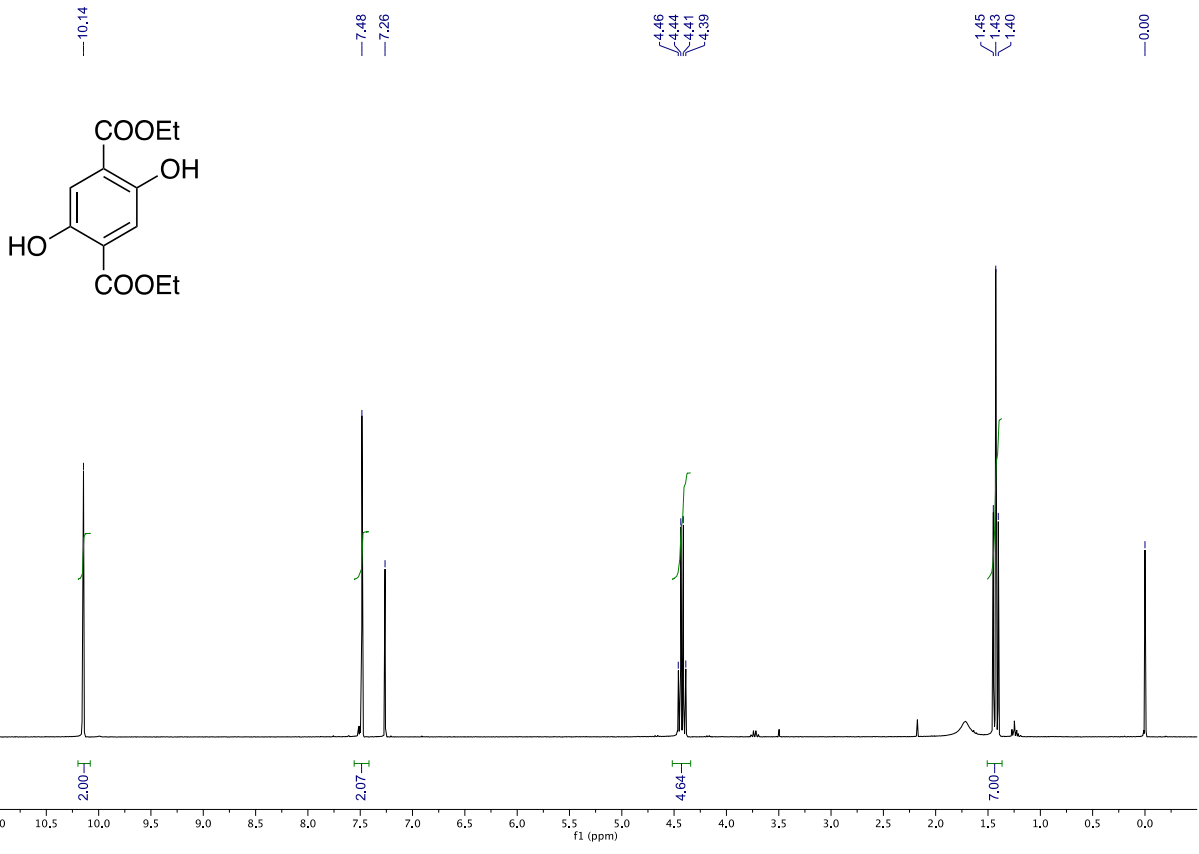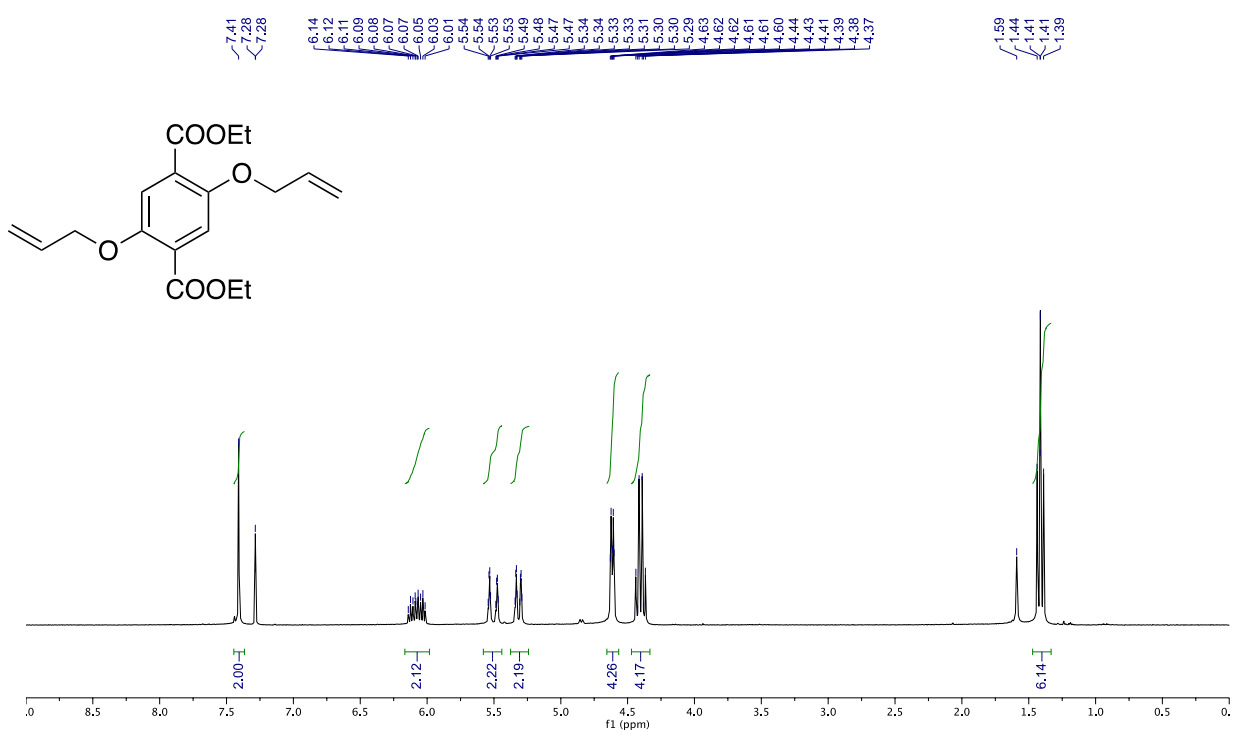

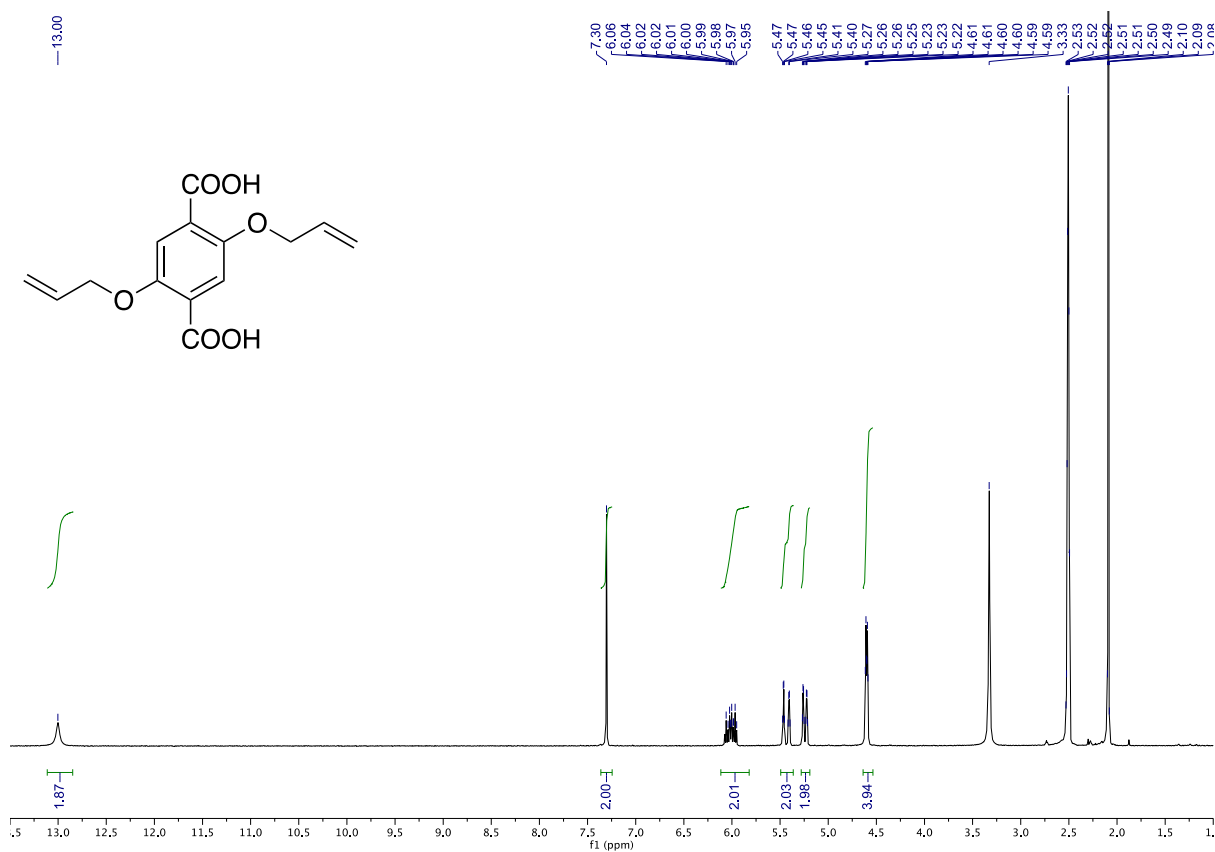

### Crystal synthesis

20 mg of 2,5-bis(allyloxy)terephthalic acid and 1.2 equivalent of lanthanide nitrate was added to 2 mL of diethylformamide (DEF) and heated in a sealed vial for 3 days at 80 °C, crystals were subsequently washed with fresh DEF and stored in solvent.

**Ce<sub>2</sub>(L)<sub>2</sub>(DEF)<sub>2</sub>(NO<sub>3</sub>)<sub>2</sub> (1):** Complex **1** was synthesised following the general procedure above using Ce(NO<sub>3</sub>)<sub>3</sub>.xH<sub>2</sub>O yielding colourless plate crystals after 3 days. Ce<sub>2</sub>C<sub>44</sub>H<sub>46</sub>O<sub>20</sub>N<sub>4</sub> Mw = 1159.02 g/mol. Selected FTIR: 2976 (w) 1602 (m) 1418 (m) 1285 (m) 1208 (m).

**Pr<sub>2</sub>(L)<sub>4</sub>(DEF)<sub>2</sub>(NO<sub>3</sub>)<sub>2</sub> (2):** Complex **2** was synthesised following the general procedure above using Pr(NO<sub>3</sub>)<sub>3</sub>.xH<sub>2</sub>O yielding pale yellow plate crystals after 3 days. Pr<sub>2</sub>C<sub>44</sub>H<sub>46</sub>O<sub>20</sub>N<sub>4</sub> Mw = 1160.60 g/mol. Selected FTIR: 2975 (w) 1600 (m) 1418 (s) 1287 (m) 1208 (m).

**Nd<sub>2</sub>(L)<sub>4</sub>(DEF)<sub>2</sub>(NO<sub>3</sub>)<sub>2</sub> (3):** Complex **3** was synthesised following the general procedure above using Nd(NO<sub>3</sub>)<sub>3</sub>.xH<sub>2</sub>O yielding pale pink plate crystals after 3 days. Nd<sub>2</sub>C<sub>44</sub>H<sub>46</sub>O<sub>20</sub>N<sub>4</sub> Mw = 1167.26 g/mol. Selected FTIR: 2981 (w) 1603 (m) 1418 (m) 1292 (m) 1211 (m).

**Eu<sub>2</sub>(L)<sub>4</sub>(DEF)<sub>2</sub>(NO<sub>3</sub>)<sub>2</sub> (4):** Complex **4** was synthesised following the general procedure above using Eu(NO<sub>3</sub>)<sub>3</sub>.xH<sub>2</sub>O yielding colourless plate crystals after 3 days. Eu<sub>2</sub>C<sub>44</sub>H<sub>46</sub>O<sub>20</sub>N<sub>4</sub> Mw = 1182.71 g/mol. Selected FTIR: 2986 (w) 1634 (m) 1412 (m) 1281 (m) 1208 (m).

**Gd<sub>2</sub>(L)<sub>4</sub>(DEF)<sub>2</sub>(NO<sub>3</sub>)<sub>2</sub> (5):** Complex **5** was synthesised following the general procedure above using Gd(NO<sub>3</sub>)<sub>3</sub>.xH<sub>2</sub>O white colourless plate crystals after 3 days. Gd<sub>2</sub>C<sub>44</sub>H<sub>46</sub>O<sub>20</sub>N<sub>4</sub> Mw = 1193.28 g/mol. Selected FTIR: 2985 (w) 1609 (m) 1411 (m) 1285 (m) 1213 (m).

**Tb<sub>2</sub>(L)<sub>4</sub>(DEF)<sub>2</sub>(NO<sub>3</sub>)<sub>2</sub> (6):** Complex 6 was synthesised following the general procedure above using Tb(NO<sub>3</sub>)<sub>3</sub>.xH<sub>2</sub>O yielding white plate crystals after 3 days. Tb<sub>2</sub>C<sub>44</sub>H<sub>46</sub>O<sub>20</sub>N<sub>4</sub> Mw = 1196.64 g/mol. Selected FTIR: 2984 (w) 1631 (m) 1417 (m) 1286 (m) 1214 (m).

**Dy<sub>2</sub>(L)<sub>4</sub>(DEF)<sub>2</sub>(NO<sub>3</sub>)<sub>2</sub> (7):** Complex 7 was synthesised following the general procedure above using Dy(NO<sub>3</sub>)<sub>3</sub>.xH<sub>2</sub>O yielding pale yellow plate crystals after 3 days. Dy<sub>2</sub>C<sub>44</sub>H<sub>46</sub>O<sub>20</sub>N<sub>4</sub> = 1203.78 g/mol.

### Single crystal X-ray Diffraction

Suitable single crystals of frameworks 1-7 were analysed using a Bruker D8 Venture diffractometer using a CuK $\alpha$   $\mu$ S X-radiation source ( $\lambda = 1.5406 \text{ \AA}$ ), and a Photon II detector. The single crystals were maintained at 150 K during data collections using an Oxford Cryosystems cryostream. Data collection and reduction were carried out using APEX III software interface, before final post processing and absorption scaling with SADABS.<sup>2</sup> Structures were solved and refined using the Olex2 interface<sup>3</sup> to the ShelX suite of programs, XT for structure solution and XL for structure refinement.<sup>4,5</sup>

**Table 1: Summary of unit cell parameters for complexes 1-7 at 150 K**

| Complex | a<br>( $\sigma$ ) | b           | c           | $\alpha$   | $\beta$   | $\gamma$  | Volume<br>( $\text{\AA}^3$ ) |
|---------|-------------------|-------------|-------------|------------|-----------|-----------|------------------------------|
| 1 (Ce)  | 9.9080(16)        | 11.1776(18) | 13.939(2)   | 109.534(4) | 95.570(4) | 96.701(5) | 1429.6(4)                    |
| 2 (Pr)  | 9.8826(9)         | 11.1554(10) | 13.9347(12) | 109.747(3) | 95.520(2) | 96.847(2) | 1420.2(2)                    |
| 3 (Nd)  | 9.9056(10)        | 11.1381(11) | 13.9162(14) | 109.803(3) | 95.425(3) | 96.535(4) | 1429.6(2)                    |
| 4 (Eu)  | 10.381(7)         | 10.4095(7)  | 13.861(10)  | 81.397(4)  | 70.936(4) | 89.265(4) | 1399.02(17)                  |
| 5 (Gd)  | 10.3633(8)        | 10.4061(8)  | 13.8433(10) | 81.375(3)  | 70.977(3) | 89.188(3) | 1394.43(18)                  |
| 6 (Tb)  | 10.3607(8)        | 10.4017(8)  | 13.8104(10) | 81.551(3)  | 71.010(4) | 89.160(3) | 1391.18(19)                  |
| 7 (Dy)  | 10.3582(8)        | 10.4047(8)  | 13.7990(11) | 91.692(3)  | 71.113(3) | 89.156(3) | 1391.51(19)                  |

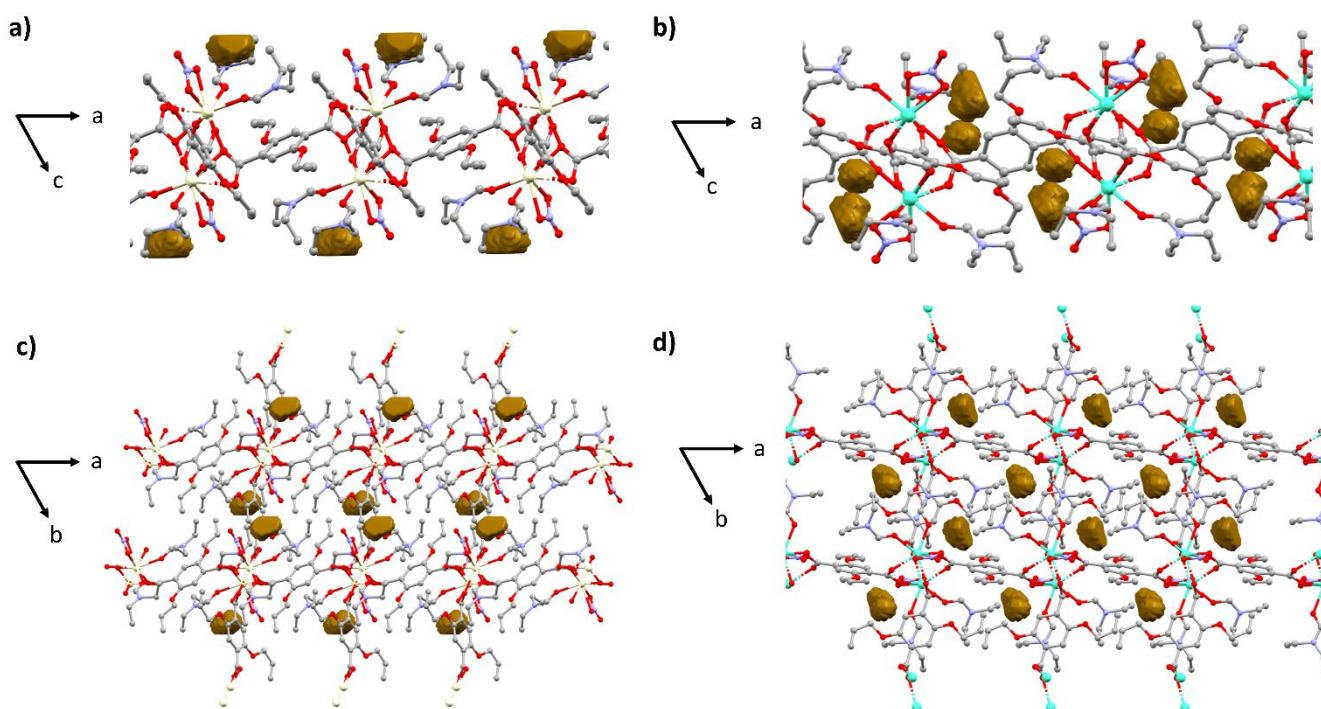

*Figure S1: Contact surface void space plots of complexes 1-3 (a and c) and complexes 4-7 (b and d). For complexes 1-3 a probe radius of 1.0 Å is shown, for complexes 4-7 a smaller probe radius of 0.8 Å is shown. Analysis shows that the largest accessible void for complexes 1-3 sits in a pocket of the edge of the network sheet. Whereas for complex 4-7 the largest void space penetrates the framework down the c axis. C- grey, O- red, N- blue, Ln- cream/green. Hydrogen atoms omitted for clarity.*

### High pressure

A crystal was placed in a diamond anvil cell containing a 1:1 pentane/isopentane mixture with diamond culets of 0.8 mm. The crystal occupies a sample chamber created by a steel gasket of 0.25 mm thickness, pre-indented to 0.15 mm with a precision drilled hole of 300  $\mu\text{m}$ . A ruby sphere was introduced to the sample chamber for pressure determination. To begin the pressure was increased from ambient in 5 kbar increments until there was a notable change in unit cell parameters. Then the diamond anvil cell (DAC) was mounted directly onto the goniometer of XIPHOS II, a four circle Huber diffractometer with Ag-K $\alpha$   $\mu\text{S}$  generator.<sup>6</sup> High pressure data were handled using the Bruker APEX2 software suite, which incorporates SAINT and SADABS for integration, cell refinement, and scaling<sup>2,7,8</sup> The SHELX program suite was used for structure solution and refinement of all structures within the OLEX2 interface.<sup>3</sup>

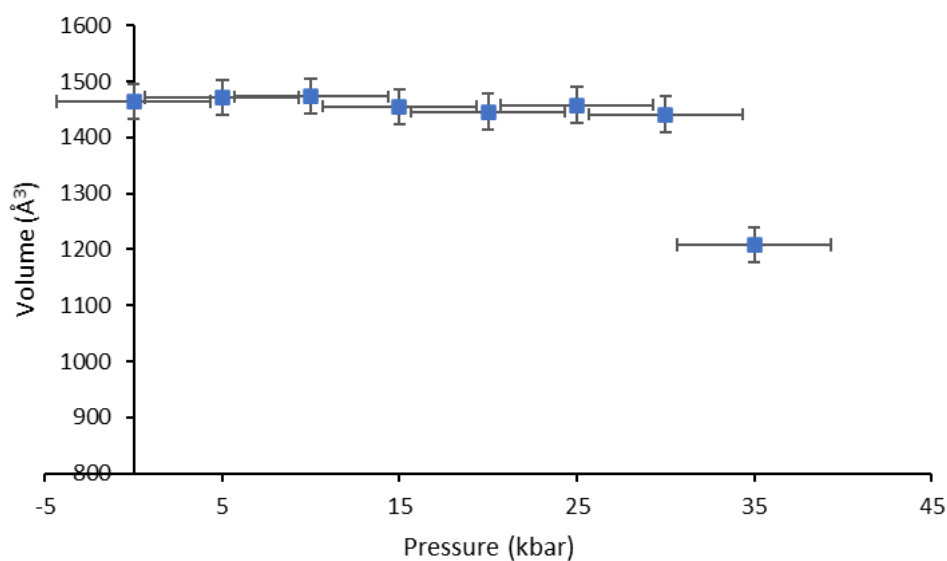

Figure S2: A scatter graph showing the unit cell volume deviation from the ambient pressure structure solution for complex 2 over the pressure range of 0-35 kbar. The complex exhibits a first order phase transition between 30 and 35 kbar.

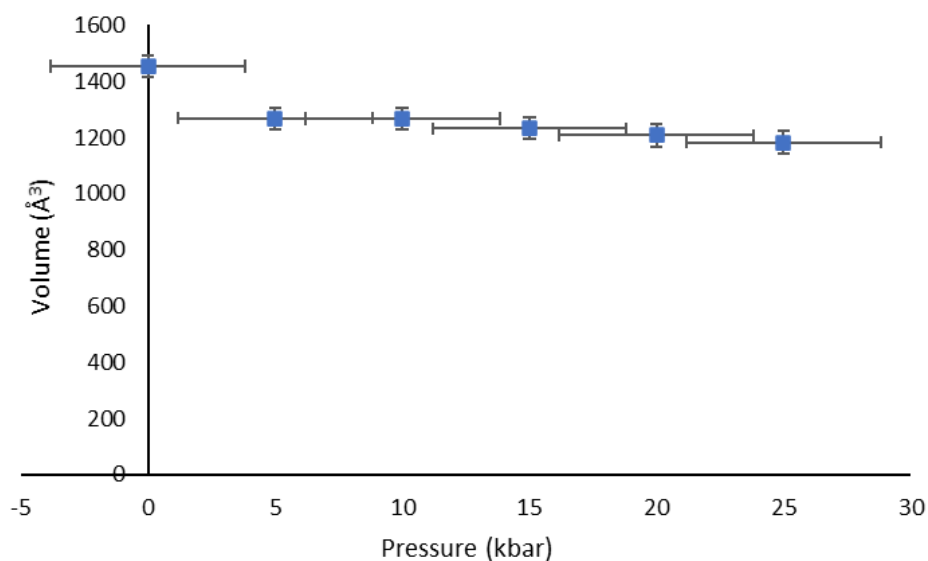

Figure S3: A scatter graph showing the unit cell volume deviation from the ambient pressure structure solution for complex 6 over the pressure range of 0-25 kbar. The complex exhibits an initial compression at 5 kbar resulting in a volume decrease of approximately 185  $\text{\AA}^3$ .

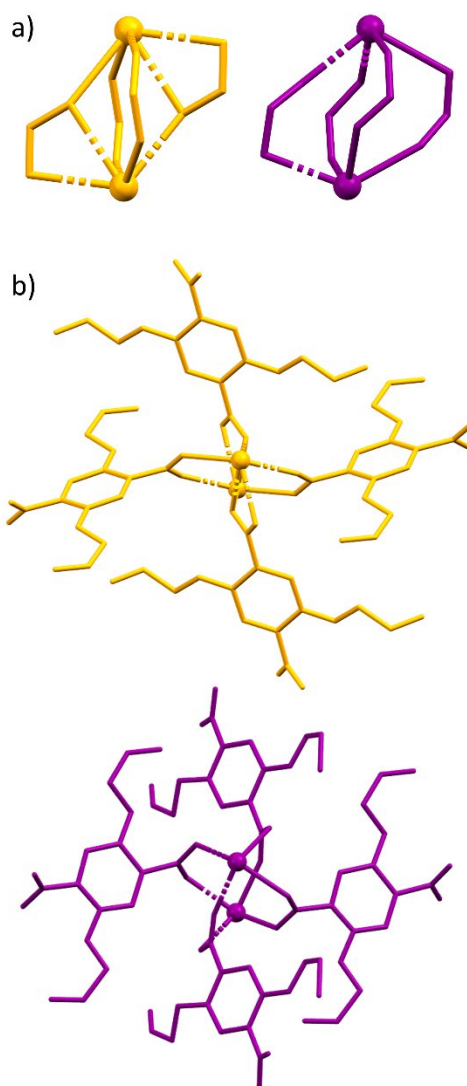

*Figure S4: Depicts individual representations of complex 2 at ambient pressure (orange) and at 35 kbar (purple). a) shows a closer inspection of the secondary building unit, highlighting the breaking of a bond. b) highlights the change in the organic allyloxy groups from staggered to eclipsed.*

**Crystallographic data**  
**1 - Ce, 2 - Pr, 3 - Nd, 4 -Eu, 5 - Gd, 6 - Tb, 7 -Dy**

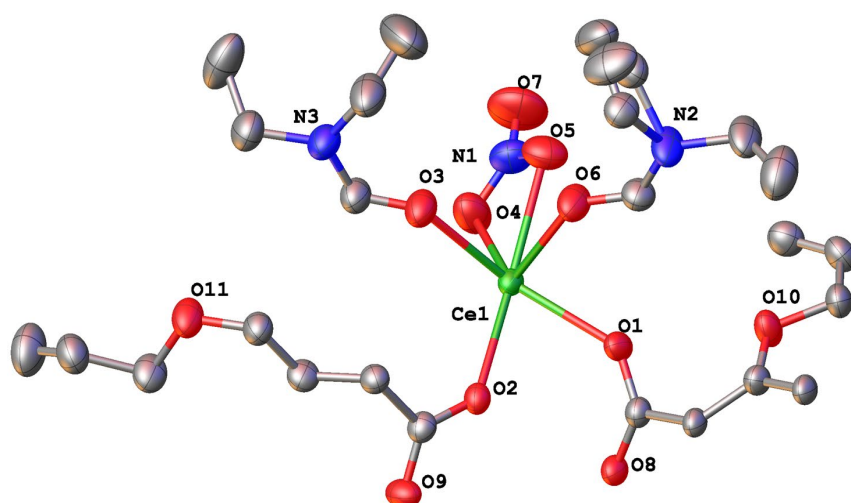

**Crystal data and structure refinement for 1.**

|                                             |                                                                  |
|---------------------------------------------|------------------------------------------------------------------|
| Identification code                         | 022_R34                                                          |
| Empirical formula                           | C <sub>24</sub> H <sub>34</sub> CeN <sub>3</sub> O <sub>11</sub> |
| Formula weight                              | 680.66                                                           |
| Temperature/K                               | 150.0                                                            |
| Crystal system                              | triclinic                                                        |
| Space group                                 | P-1                                                              |
| a/Å                                         | 9.9080(16)                                                       |
| b/Å                                         | 11.1776(18)                                                      |
| c/Å                                         | 13.939(2)                                                        |
| $\alpha$ /°                                 | 109.534(4)                                                       |
| $\beta$ /°                                  | 95.570(4)                                                        |
| $\gamma$ /°                                 | 96.701(5)                                                        |
| Volume/Å <sup>3</sup>                       | 1429.6(4)                                                        |
| Z                                           | 2                                                                |
| $\rho_{\text{calc}}/\text{cm}^3$            | 1.581                                                            |
| $\mu/\text{mm}^{-1}$                        | 12.835                                                           |
| F(000)                                      | 690.0                                                            |
| Crystal size/mm <sup>3</sup>                | 0.2 × 0.07 × 0.04                                                |
| Radiation                                   | CuK $\alpha$ ( $\lambda$ = 1.54178)                              |
| 2 $\theta$ range for data collection/°      | 6.8 to 135.666                                                   |
| Index ranges                                | -11 ≤ h ≤ 11, -13 ≤ k ≤ 13, -16 ≤ l ≤ 16                         |
| Reflections collected                       | 42338                                                            |
| Independent reflections                     | 5030 [R <sub>int</sub> = 0.0680, R <sub>sigma</sub> = 0.0332]    |
| Data/restraints/parameters                  | 5030/318/375                                                     |
| Goodness-of-fit on F <sup>2</sup>           | 1.039                                                            |
| Final R indexes [I >= 2 $\sigma$ (I)]       | R <sub>1</sub> = 0.0391, wR <sub>2</sub> = 0.1092                |
| Final R indexes [all data]                  | R <sub>1</sub> = 0.0398, wR <sub>2</sub> = 0.1099                |
| Largest diff. peak/hole / e Å <sup>-3</sup> | 1.53/-0.78                                                       |

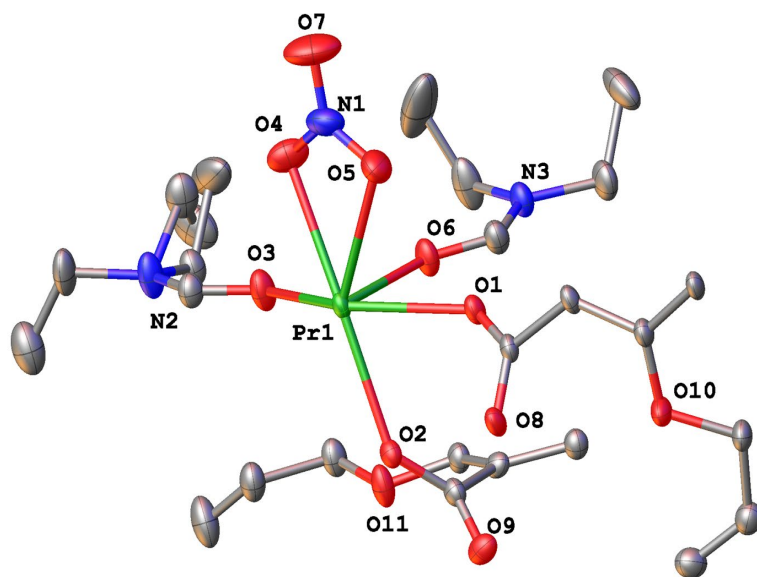

### Crystal data and structure refinement for 2

|                                             |                                                                   |
|---------------------------------------------|-------------------------------------------------------------------|
| Identification code                         | lrh_022_r35                                                       |
| Empirical formula                           | C <sub>24</sub> H <sub>34</sub> N <sub>3</sub> O <sub>11</sub> Pr |
| Formula weight                              | 681.45                                                            |
| Temperature/K                               | 150.0                                                             |
| Crystal system                              | triclinic                                                         |
| Space group                                 | P-1                                                               |
| a/Å                                         | 9.8826(9)                                                         |
| b/Å                                         | 11.1554(10)                                                       |
| c/Å                                         | 13.9347(12)                                                       |
| $\alpha$ /°                                 | 109.747(3)                                                        |
| $\beta$ /°                                  | 95.520(2)                                                         |
| $\gamma$ /°                                 | 96.847(2)                                                         |
| Volume/Å <sup>3</sup>                       | 1420.2(2)                                                         |
| Z                                           | 2                                                                 |
| $\rho_{\text{calc}}/\text{cm}^3$            | 1.594                                                             |
| $\mu/\text{mm}^{-1}$                        | 13.694                                                            |
| F(000)                                      | 692.0                                                             |
| Crystal size/mm <sup>3</sup>                | 0.1 × 0.06 × 0.03                                                 |
| Radiation                                   | CuK $\alpha$ ( $\lambda$ = 1.54178)                               |
| 2 $\theta$ range for data collection/°      | 10.554 to 133.188                                                 |
| Index ranges                                | -11 ≤ h ≤ 11, -13 ≤ k ≤ 13, -16 ≤ l ≤ 16                          |
| Reflections collected                       | 58828                                                             |
| Independent reflections                     | 4970 [R <sub>int</sub> = 0.0548, R <sub>sigma</sub> = 0.0232]     |
| Data/restraints/parameters                  | 4970/296/376                                                      |
| Goodness-of-fit on F <sup>2</sup>           | 1.044                                                             |
| Final R indexes [I >= 2 $\sigma$ (I)]       | R <sub>1</sub> = 0.0306, wR <sub>2</sub> = 0.0818                 |
| Final R indexes [all data]                  | R <sub>1</sub> = 0.0307, wR <sub>2</sub> = 0.0819                 |
| Largest diff. peak/hole / e Å <sup>-3</sup> | 1.70/-1.47                                                        |



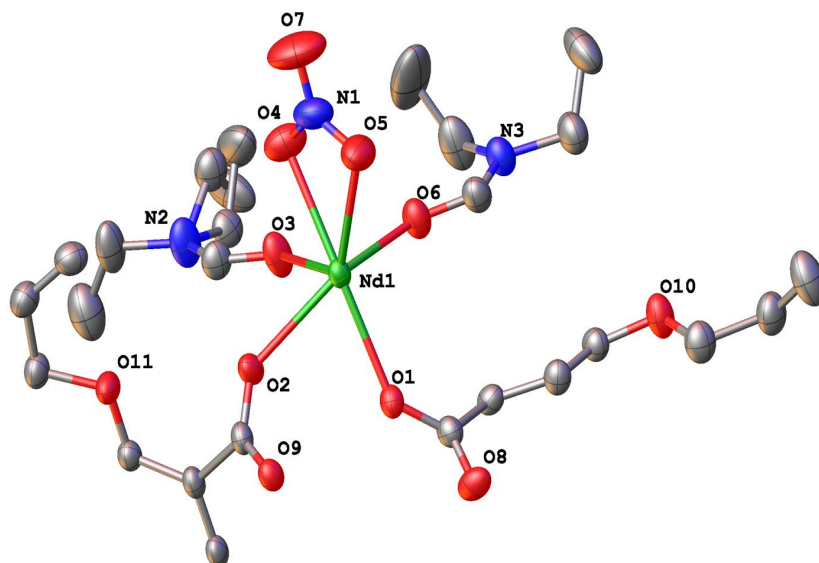

### Crystal data and structure refinement for 3

|                                             |                                                                  |
|---------------------------------------------|------------------------------------------------------------------|
| Identification code                         | lrh_022_r36                                                      |
| Empirical formula                           | C <sub>24</sub> H <sub>34</sub> N <sub>3</sub> NdO <sub>11</sub> |
| Formula weight                              | 684.78                                                           |
| Temperature/K                               | 150.0                                                            |
| Crystal system                              | triclinic                                                        |
| Space group                                 | P-1                                                              |
| a/Å                                         | 9.9056(10)                                                       |
| b/Å                                         | 11.1381(11)                                                      |
| c/Å                                         | 13.9162(14)                                                      |
| $\alpha$ /°                                 | 109.803(3)                                                       |
| $\beta$ /°                                  | 95.425(3)                                                        |
| $\gamma$ /°                                 | 96.535(4)                                                        |
| Volume/Å <sup>3</sup>                       | 1420.6(2)                                                        |
| Z                                           | 2                                                                |
| $\rho_{\text{calc}}/\text{cm}^3$            | 1.601                                                            |
| $\mu/\text{mm}^{-1}$                        | 14.479                                                           |
| F(000)                                      | 694.0                                                            |
| Crystal size/mm <sup>3</sup>                | 0.08 × 0.03 × 0.01                                               |
| Radiation                                   | CuK $\alpha$ ( $\lambda$ = 1.54178)                              |
| 2 $\theta$ range for data collection/°      | 6.82 to 134.222                                                  |
| Index ranges                                | -11 ≤ h ≤ 11, -13 ≤ k ≤ 13, -16 ≤ l ≤ 16                         |
| Reflections collected                       | 54599                                                            |
| Independent reflections                     | 4998 [R <sub>int</sub> = 0.0623, R <sub>sigma</sub> = 0.0271]    |
| Data/restraints/parameters                  | 4998/294/376                                                     |
| Goodness-of-fit on F <sup>2</sup>           | 1.107                                                            |
| Final R indexes [I >= 2 $\sigma$ (I)]       | R <sub>1</sub> = 0.0376, wR <sub>2</sub> = 0.1043                |
| Final R indexes [all data]                  | R <sub>1</sub> = 0.0385, wR <sub>2</sub> = 0.1054                |
| Largest diff. peak/hole / e Å <sup>-3</sup> | 1.77/-0.77                                                       |

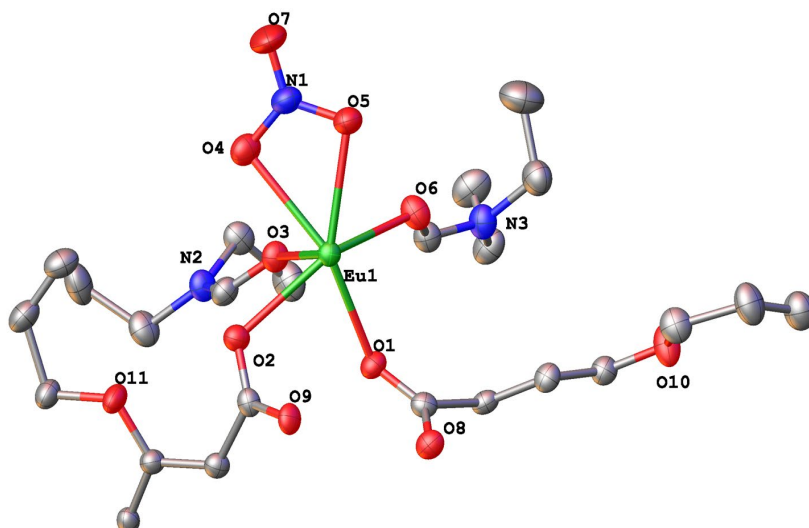

### Crystal data and structure refinement for 4

|                                             |                                                                  |
|---------------------------------------------|------------------------------------------------------------------|
| Identification code                         | 022_R37                                                          |
| Empirical formula                           | C <sub>24</sub> H <sub>34</sub> EuN <sub>3</sub> O <sub>11</sub> |
| Formula weight                              | 692.50                                                           |
| Temperature/K                               | 150.0                                                            |
| Crystal system                              | triclinic                                                        |
| Space group                                 | P-1                                                              |
| a/Å                                         | 10.3817(7)                                                       |
| b/Å                                         | 10.4095(7)                                                       |
| c/Å                                         | 13.8631(10)                                                      |
| $\alpha$ /°                                 | 81.397(4)                                                        |
| $\beta$ /°                                  | 70.936(4)                                                        |
| $\gamma$ /°                                 | 89.265(4)                                                        |
| Volume/Å <sup>3</sup>                       | 1399.02(17)                                                      |
| Z                                           | 2                                                                |
| $\rho_{\text{calc}}/\text{cm}^3$            | 1.644                                                            |
| $\mu/\text{mm}^{-1}$                        | 16.589                                                           |
| F(000)                                      | 700.0                                                            |
| Crystal size/mm <sup>3</sup>                | 0.08 × 0.02 × 0.01                                               |
| Radiation                                   | CuK $\alpha$ ( $\lambda$ = 1.54178)                              |
| 2 $\theta$ range for data collection/°      | 8.598 to 145.534                                                 |
| Index ranges                                | -12 ≤ h ≤ 12, -12 ≤ k ≤ 12, -16 ≤ l ≤ 16                         |
| Reflections collected                       | 35592                                                            |
| Independent reflections                     | 5429 [R <sub>int</sub> = 0.0999, R <sub>sigma</sub> = 0.0524]    |
| Data/restraints/parameters                  | 5429/265/356                                                     |
| Goodness-of-fit on F <sup>2</sup>           | 1.090                                                            |
| Final R indexes [I ≥ 2 $\sigma$ (I)]        | R <sub>1</sub> = 0.0467, wR <sub>2</sub> = 0.1251                |
| Final R indexes [all data]                  | R <sub>1</sub> = 0.0516, wR <sub>2</sub> = 0.1289                |
| Largest diff. peak/hole / e Å <sup>-3</sup> | 1.88/-0.74                                                       |

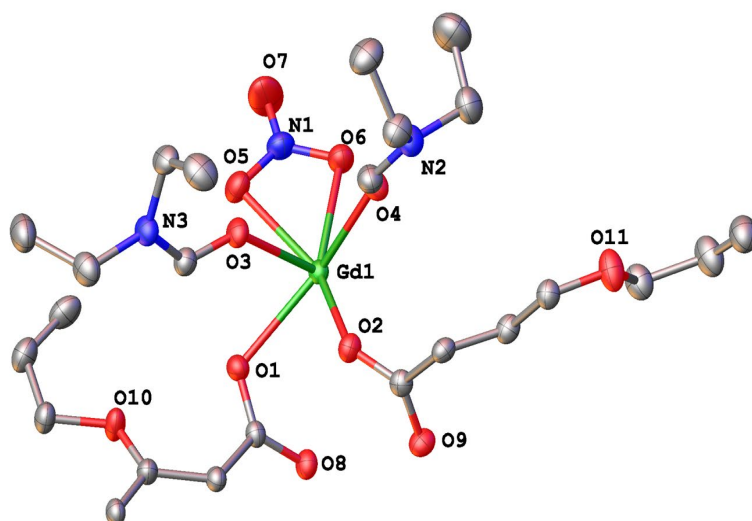

### Crystal data and structure refinement for 5

|                                             |                                                                  |
|---------------------------------------------|------------------------------------------------------------------|
| Identification code                         | lrh_022_r38                                                      |
| Empirical formula                           | C <sub>24</sub> H <sub>34</sub> GdN <sub>3</sub> O <sub>11</sub> |
| Formula weight                              | 697.79                                                           |
| Temperature/K                               | 150.0                                                            |
| Crystal system                              | triclinic                                                        |
| Space group                                 | P-1                                                              |
| a/Å                                         | 10.3633(8)                                                       |
| b/Å                                         | 10.4061(8)                                                       |
| c/Å                                         | 13.8433(10)                                                      |
| $\alpha$ /°                                 | 81.375(3)                                                        |
| $\beta$ /°                                  | 70.977(3)                                                        |
| $\gamma$ /°                                 | 89.188(3)                                                        |
| Volume/Å <sup>3</sup>                       | 1394.43(18)                                                      |
| Z                                           | 2                                                                |
| $\rho_{\text{calc}}/\text{cm}^3$            | 1.662                                                            |
| $\mu/\text{mm}^{-1}$                        | 15.927                                                           |
| F(000)                                      | 702.0                                                            |
| Crystal size/mm <sup>3</sup>                | 0.06 × 0.02 × 0.01                                               |
| Radiation                                   | CuK $\alpha$ ( $\lambda$ = 1.54178)                              |
| 2 $\theta$ range for data collection/°      | 6.836 to 134.368                                                 |
| Index ranges                                | -12 ≤ h ≤ 11, -12 ≤ k ≤ 12, -16 ≤ l ≤ 16                         |
| Reflections collected                       | 53274                                                            |
| Independent reflections                     | 4904 [R <sub>int</sub> = 0.0629, R <sub>sigma</sub> = 0.0271]    |
| Data/restraints/parameters                  | 4904/265/357                                                     |
| Goodness-of-fit on F <sup>2</sup>           | 1.081                                                            |
| Final R indexes [I ≥ 2 $\sigma$ (I)]        | R <sub>1</sub> = 0.0222, wR <sub>2</sub> = 0.0593                |
| Final R indexes [all data]                  | R <sub>1</sub> = 0.0231, wR <sub>2</sub> = 0.0598                |
| Largest diff. peak/hole / e Å <sup>-3</sup> | 0.42/-0.55                                                       |

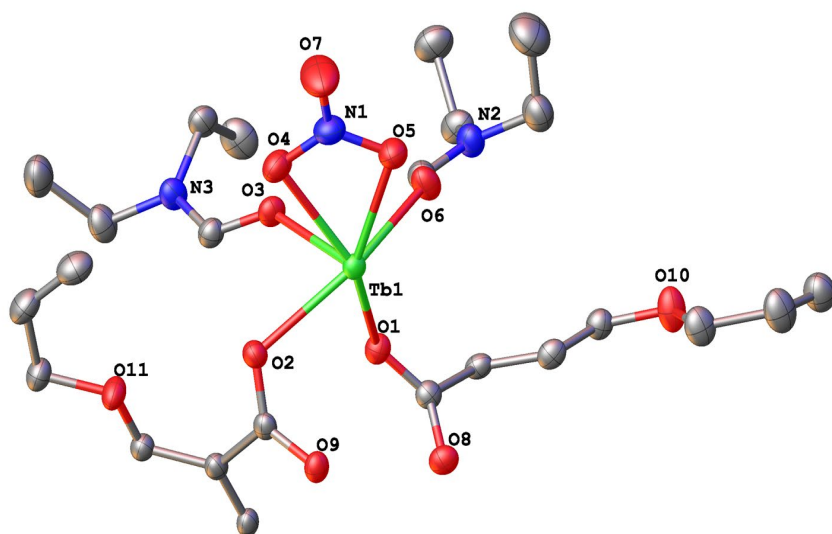

### Crystal data and structure refinement for 6

|                                             |                                                                   |
|---------------------------------------------|-------------------------------------------------------------------|
| Identification code                         | LRH_022_R39_0m                                                    |
| Empirical formula                           | C <sub>24</sub> H <sub>34</sub> N <sub>3</sub> O <sub>11</sub> Tb |
| Formula weight                              | 699.46                                                            |
| Temperature/K                               | 150.00                                                            |
| Crystal system                              | triclinic                                                         |
| Space group                                 | P-1                                                               |
| a/Å                                         | 10.3607(8)                                                        |
| b/Å                                         | 10.4017(8)                                                        |
| c/Å                                         | 13.8104(10)                                                       |
| $\alpha$ /°                                 | 81.551(3)                                                         |
| $\beta$ /°                                  | 71.010(4)                                                         |
| $\gamma$ /°                                 | 89.160(3)                                                         |
| Volume/Å <sup>3</sup>                       | 1391.18(19)                                                       |
| Z                                           | 2                                                                 |
| $\rho_{\text{calc}}/\text{cm}^3$            | 1.670                                                             |
| $\mu/\text{mm}^{-1}$                        | 13.045                                                            |
| F(000)                                      | 704.0                                                             |
| Crystal size/mm <sup>3</sup>                | 0.07 × 0.03 × 0.02                                                |
| Radiation                                   | CuK $\alpha$ ( $\lambda$ = 1.54178)                               |
| 2 $\theta$ range for data collection/°      | 6.846 to 134.008                                                  |
| Index ranges                                | -12 ≤ h ≤ 12, -12 ≤ k ≤ 12, -16 ≤ l ≤ 16                          |
| Reflections collected                       | 61503                                                             |
| Independent reflections                     | 4892 [R <sub>int</sub> = 0.0662, R <sub>sigma</sub> = 0.0259]     |
| Data/restraints/parameters                  | 4892/265/356                                                      |
| Goodness-of-fit on F <sup>2</sup>           | 1.116                                                             |
| Final R indexes [I ≥ 2 $\sigma$ (I)]        | R <sub>1</sub> = 0.0265, wR <sub>2</sub> = 0.0719                 |
| Final R indexes [all data]                  | R <sub>1</sub> = 0.0281, wR <sub>2</sub> = 0.0728                 |
| Largest diff. peak/hole / e Å <sup>-3</sup> | 0.66/-0.47                                                        |

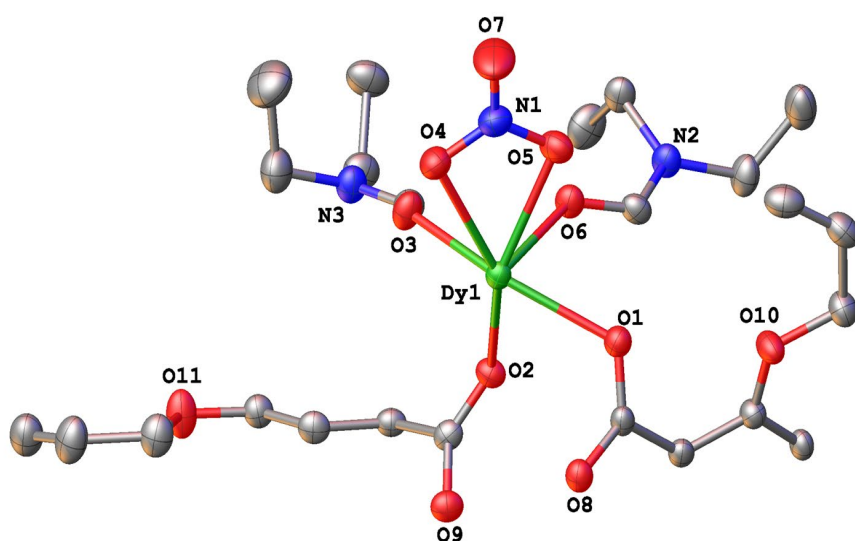

### Crystal data and structure refinement for 7

|                                             |                                                                  |
|---------------------------------------------|------------------------------------------------------------------|
| Identification code                         | LRH_022_R40                                                      |
| Empirical formula                           | C <sub>24</sub> H <sub>34</sub> DyN <sub>3</sub> O <sub>11</sub> |
| Formula weight                              | 703.04                                                           |
| Temperature/K                               | 150.00                                                           |
| Crystal system                              | triclinic                                                        |
| Space group                                 | P-1                                                              |
| a/Å                                         | 10.3582(8)                                                       |
| b/Å                                         | 10.4047(8)                                                       |
| c/Å                                         | 13.7990(11)                                                      |
| $\alpha$ /°                                 | 81.692(3)                                                        |
| $\beta$ /°                                  | 71.113(3)                                                        |
| $\gamma$ /°                                 | 89.156(3)                                                        |
| Volume/Å <sup>3</sup>                       | 1391.52(19)                                                      |
| Z                                           | 2                                                                |
| $\rho_{\text{calc}}/\text{cm}^3$            | 1.678                                                            |
| $\mu/\text{mm}^{-1}$                        | 14.911                                                           |
| F(000)                                      | 706.0                                                            |
| Crystal size/mm <sup>3</sup>                | 0.07 × 0.04 × 0.02                                               |
| Radiation                                   | CuK $\alpha$ ( $\lambda$ = 1.54178)                              |
| 2 $\theta$ range for data collection/°      | 8.594 to 144.876                                                 |
| Index ranges                                | -12 ≤ h ≤ 12, -12 ≤ k ≤ 12, -16 ≤ l ≤ 15                         |
| Reflections collected                       | 20691                                                            |
| Independent reflections                     | 5362 [R <sub>int</sub> = 0.0598, R <sub>sigma</sub> = 0.0509]    |
| Data/restraints/parameters                  | 5362/0/357                                                       |
| Goodness-of-fit on F <sup>2</sup>           | 1.072                                                            |
| Final R indexes [I ≥ 2 $\sigma$ (I)]        | R <sub>1</sub> = 0.0401, wR <sub>2</sub> = 0.1080                |
| Final R indexes [all data]                  | R <sub>1</sub> = 0.0415, wR <sub>2</sub> = 0.1091                |
| Largest diff. peak/hole / e Å <sup>-3</sup> | 1.38/-1.24                                                       |

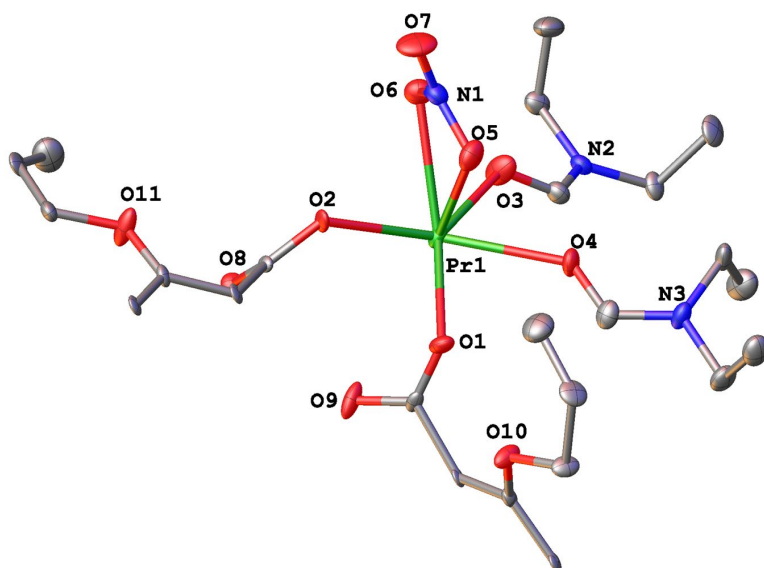

### Crystal data and structure refinement for 022 R35 35kbar

|                                             |                                                                   |
|---------------------------------------------|-------------------------------------------------------------------|
| Identification code                         | 022 R35 35kbar                                                    |
| Empirical formula                           | C <sub>24</sub> H <sub>34</sub> N <sub>3</sub> O <sub>11</sub> Pr |
| Formula weight                              | 681.45                                                            |
| Temperature/K                               | 293.0                                                             |
| Crystal system                              | triclinic                                                         |
| Space group                                 | P-1                                                               |
| a/Å                                         | 9.8824(4)                                                         |
| b/Å                                         | 10.0039(4)                                                        |
| c/Å                                         | 13.3049(9)                                                        |
| $\alpha$ /°                                 | 98.203(4)                                                         |
| $\beta$ /°                                  | 111.376(4)                                                        |
| $\gamma$ /°                                 | 91.257(2)                                                         |
| Volume/Å <sup>3</sup>                       | 1208.43(11)                                                       |
| Z                                           | 2                                                                 |
| $\rho_{\text{calc}}/\text{cm}^3$            | 1.873                                                             |
| $\mu/\text{mm}^{-1}$                        | 1.107                                                             |
| F(000)                                      | 692.0                                                             |
| Crystal size/mm <sup>3</sup>                | 0.06 × 0.03 × 0.02                                                |
| Radiation                                   | AgK $\alpha$ ( $\lambda = 0.56086$ )                              |
| 2 $\theta$ range for data collection/°      | 3.256 to 39.304                                                   |
| Index ranges                                | -11 ≤ h ≤ 11, -11 ≤ k ≤ 11, -9 ≤ l ≤ 10                           |
| Reflections collected                       | 21137                                                             |
| Independent reflections                     | 1688 [R <sub>int</sub> = 0.0449, R <sub>sigma</sub> = 0.0225]     |
| Data/restraints/parameters                  | 1688/268/338                                                      |
| Goodness-of-fit on F <sup>2</sup>           | 1.074                                                             |
| Final R indexes [I ≥ 2 $\sigma$ (I)]        | R <sub>1</sub> = 0.0216, wR <sub>2</sub> = 0.0502                 |
| Final R indexes [all data]                  | R <sub>1</sub> = 0.0244, wR <sub>2</sub> = 0.0513                 |
| Largest diff. peak/hole / e Å <sup>-3</sup> | 0.46/-0.32                                                        |

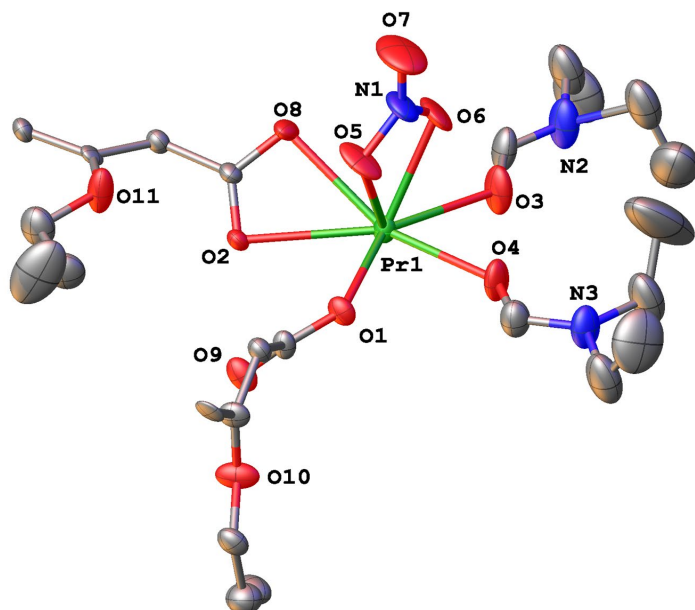

### Crystal data and structure refinement for 022\_R35\_25kbar

|                                             |                                                                   |
|---------------------------------------------|-------------------------------------------------------------------|
| Identification code                         | 022_R35_25kbar                                                    |
| Empirical formula                           | C <sub>24</sub> H <sub>34</sub> N <sub>3</sub> O <sub>11</sub> Pr |
| Formula weight                              | 681.45                                                            |
| Temperature/K                               | 296.15                                                            |
| Crystal system                              | triclinic                                                         |
| Space group                                 | P-1                                                               |
| a/Å                                         | 10.0371(3)                                                        |
| b/Å                                         | 11.1440(3)                                                        |
| c/Å                                         | 14.0248(8)                                                        |
| $\alpha$ /°                                 | 109.464(3)                                                        |
| $\beta$ /°                                  | 94.951(3)                                                         |
| $\gamma$ /°                                 | 96.1010(10)                                                       |
| Volume/Å <sup>3</sup>                       | 1458.25(11)                                                       |
| Z                                           | 2                                                                 |
| $\rho_{\text{calc}}/\text{cm}^3$            | 1.552                                                             |
| $\mu/\text{mm}^{-1}$                        | 0.917                                                             |
| F(000)                                      | 692.0                                                             |
| Crystal size/mm <sup>3</sup>                | 0.06 × 0.03 × 0.02                                                |
| Radiation                                   | AgK $\alpha$ ( $\lambda$ = 0.56086)                               |
| 2 $\theta$ range for data collection/°      | 3.09 to 39.232                                                    |
| Index ranges                                | -11 ≤ h ≤ 12, -13 ≤ k ≤ 13, -10 ≤ l ≤ 10                          |
| Reflections collected                       | 26704                                                             |
| Independent reflections                     | 2021 [R <sub>int</sub> = 0.0466, R <sub>sigma</sub> = 0.0233]     |
| Data/restraints/parameters                  | 2021/292/332                                                      |
| Goodness-of-fit on F <sup>2</sup>           | 1.019                                                             |
| Final R indexes [I >= 2 $\sigma$ (I)]       | R <sub>1</sub> = 0.0324, wR <sub>2</sub> = 0.0804                 |
| Final R indexes [all data]                  | R <sub>1</sub> = 0.0363, wR <sub>2</sub> = 0.0833                 |
| Largest diff. peak/hole / e Å <sup>-3</sup> | 0.62/-0.74                                                        |

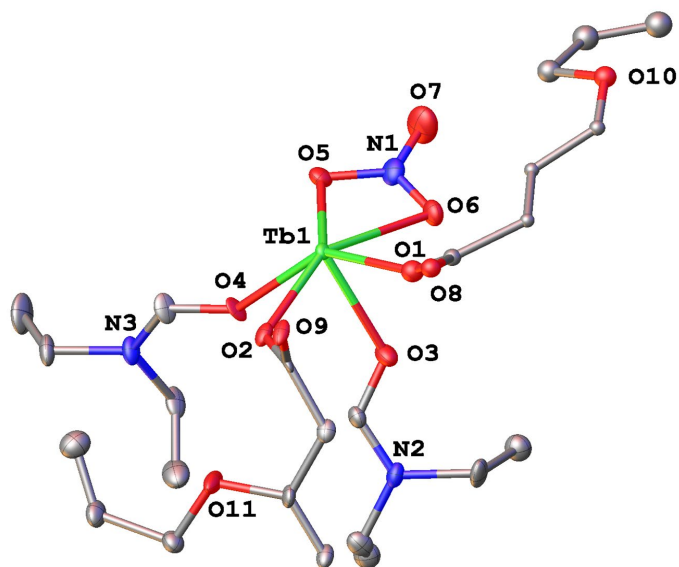

### Crystal data and structure refinement for 022\_R39\_HP

|                                             |                                                                   |
|---------------------------------------------|-------------------------------------------------------------------|
| Identification code                         | 022_R39_25kbar                                                    |
| Empirical formula                           | C <sub>24</sub> H <sub>34</sub> N <sub>3</sub> O <sub>11</sub> Tb |
| Formula weight                              | 699.46                                                            |
| Temperature/K                               | 298.0                                                             |
| Crystal system                              | triclinic                                                         |
| Space group                                 | P-1                                                               |
| a/Å                                         | 9.8113(6)                                                         |
| b/Å                                         | 9.9140(10)                                                        |
| c/Å                                         | 13.2568(8)                                                        |
| $\alpha$ /°                                 | 81.104(7)                                                         |
| $\beta$ /°                                  | 68.313(3)                                                         |
| $\gamma$ /°                                 | 88.342(7)                                                         |
| Volume/Å <sup>3</sup>                       | 1183.23(16)                                                       |
| Z                                           | 2                                                                 |
| $\rho_{\text{calc}}/\text{cm}^3$            | 1.963                                                             |
| $\mu/\text{mm}^{-1}$                        | 1.630                                                             |
| F(000)                                      | 704.0                                                             |
| Crystal size/mm <sup>3</sup>                | 0.07 × 0.03 × 0.02                                                |
| Radiation                                   | AgK $\alpha$ ( $\lambda$ = 0.56086)                               |
| 2 $\theta$ range for data collection/°      | 2.64 to 39.17                                                     |
| Index ranges                                | -11 ≤ h ≤ 11, -6 ≤ k ≤ 5, -15 ≤ l ≤ 15                            |
| Reflections collected                       | 22945                                                             |
| Independent reflections                     | 1625 [R <sub>int</sub> = 0.0862, R <sub>sigma</sub> = 0.0438]     |
| Data/restraints/parameters                  | 1625/192/300                                                      |
| Goodness-of-fit on F <sup>2</sup>           | 1.041                                                             |
| Final R indexes [I ≥ 2 $\sigma$ (I)]        | R <sub>1</sub> = 0.0303, wR <sub>2</sub> = 0.0589                 |
| Final R indexes [all data]                  | R <sub>1</sub> = 0.0396, wR <sub>2</sub> = 0.0620                 |
| Largest diff. peak/hole / e Å <sup>-3</sup> | 0.55/-0.38                                                        |



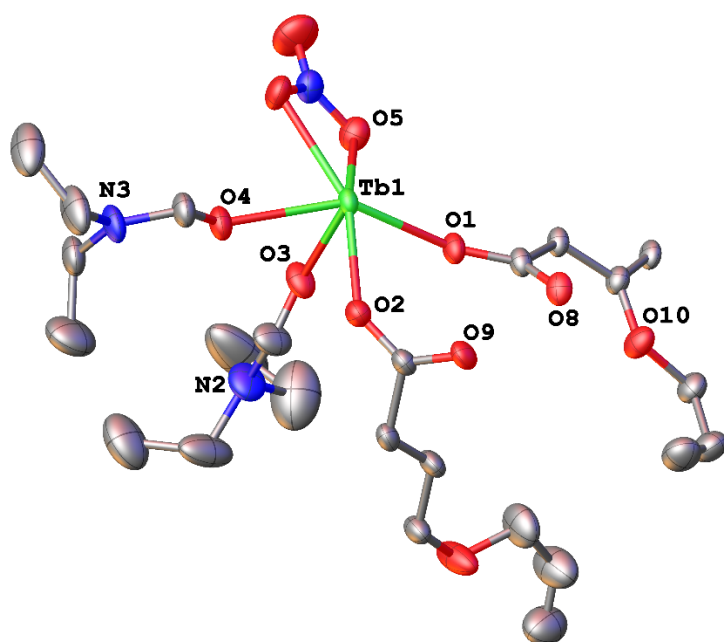

### Crystal data and structure refinement for 022\_R39\_rt (Complex 6)

|                                             |                                                                   |
|---------------------------------------------|-------------------------------------------------------------------|
| Identification code                         | 022_R39_rt                                                        |
| Empirical formula                           | C <sub>24</sub> H <sub>34</sub> N <sub>3</sub> O <sub>11</sub> Tb |
| Formula weight                              | 699.46                                                            |
| Temperature/K                               | 290.0                                                             |
| Crystal system                              | triclinic                                                         |
| Space group                                 | P-1                                                               |
| a/Å                                         | 10.4991(13)                                                       |
| b/Å                                         | 10.5703(13)                                                       |
| c/Å                                         | 13.8816(17)                                                       |
| α/°                                         | 83.999(5)                                                         |
| β/°                                         | 71.592(6)                                                         |
| γ/°                                         | 89.746(5)                                                         |
| Volume/Å <sup>3</sup>                       | 1453.1(3)                                                         |
| Z                                           | 2                                                                 |
| ρ <sub>calc</sub> /g/cm <sup>3</sup>        | 1.599                                                             |
| μ/mm <sup>-1</sup>                          | 12.490                                                            |
| F(000)                                      | 704.0                                                             |
| Crystal size/mm <sup>3</sup>                | 0.145 × 0.075 × 0.052                                             |
| Radiation                                   | CuKα (λ = 1.54178)                                                |
| 2θ range for data collection/°              | 9.298 to 134.434                                                  |
| Index ranges                                | -12 ≤ h ≤ 12, -12 ≤ k ≤ 12, -16 ≤ l ≤ 16                          |
| Reflections collected                       | 15951                                                             |
| Independent reflections                     | 5063 [R <sub>int</sub> = 0.0637, R <sub>sigma</sub> = 0.0569]     |
| Data/restraints/parameters                  | 5063/273/355                                                      |
| Goodness-of-fit on F <sup>2</sup>           | 1.111                                                             |
| Final R indexes [I >= 2σ (I)]               | R <sub>1</sub> = 0.0535, wR <sub>2</sub> = 0.1506                 |
| Final R indexes [all data]                  | R <sub>1</sub> = 0.0567, wR <sub>2</sub> = 0.1533                 |
| Largest diff. peak/hole / e Å <sup>-3</sup> | 1.44/-0.87                                                        |

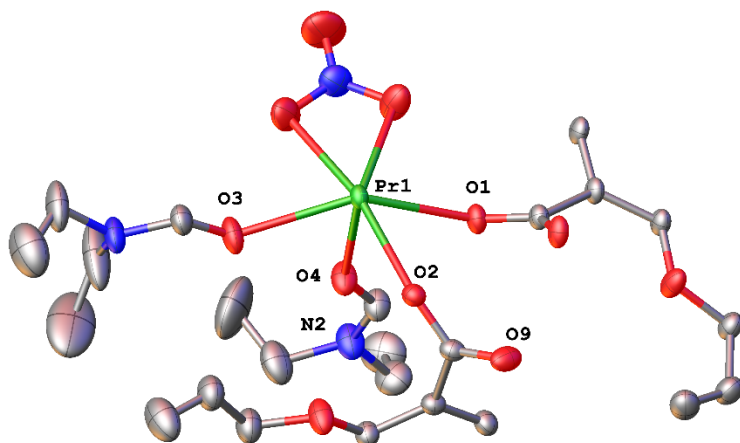

### Crystal data and structure refinement for 022\_R35\_rt (Complex 2)

|                                             |                                                                   |
|---------------------------------------------|-------------------------------------------------------------------|
| Identification code                         | 022_R35_rt                                                        |
| Empirical formula                           | C <sub>24</sub> H <sub>34</sub> N <sub>3</sub> O <sub>11</sub> Pr |
| Formula weight                              | 681.45                                                            |
| Temperature/K                               | 290.0                                                             |
| Crystal system                              | triclinic                                                         |
| Space group                                 | P-1                                                               |
| a/Å                                         | 10.0678(11)                                                       |
| b/Å                                         | 11.1512(12)                                                       |
| c/Å                                         | 14.0297(15)                                                       |
| α/°                                         | 109.416(3)                                                        |
| β/°                                         | 95.138(3)                                                         |
| γ/°                                         | 95.947(3)                                                         |
| Volume/Å <sup>3</sup>                       | 1464.6(3)                                                         |
| Z                                           | 2                                                                 |
| ρ <sub>calc</sub> /g/cm <sup>3</sup>        | 1.545                                                             |
| μ/mm <sup>-1</sup>                          | 13.280                                                            |
| F(000)                                      | 692.0                                                             |
| Crystal size/mm <sup>3</sup>                | 0.16 × 0.16 × 0.13                                                |
| Radiation                                   | CuKα (λ = 1.54178)                                                |
| 2θ range for data collection/°              | 10.442 to 141.198                                                 |
| Index ranges                                | -12 ≤ h ≤ 12, -13 ≤ k ≤ 13, -16 ≤ l ≤ 17                          |
| Reflections collected                       | 21987                                                             |
| Independent reflections                     | 5455 [R <sub>int</sub> = 0.0571, R <sub>sigma</sub> = 0.0479]     |
| Data/restraints/parameters                  | 5455/272/355                                                      |
| Goodness-of-fit on F <sup>2</sup>           | 1.084                                                             |
| Final R indexes [I >= 2σ (I)]               | R <sub>1</sub> = 0.0411, wR <sub>2</sub> = 0.1136                 |
| Final R indexes [all data]                  | R <sub>1</sub> = 0.0420, wR <sub>2</sub> = 0.1146                 |
| Largest diff. peak/hole / e Å <sup>-3</sup> | 1.17/-0.79                                                        |

## References

1. S. Du, W. Wang, J. Zhang and X. Wan, *Chem. Commun.*, 2014, **50**, 9929-9931
2. SADABS, Bruker AXS INC., Madison, WI, 2001.
3. O. V. Dolomanov, L. J. Bourhis, R. J. Gildea, J. A. K. Howard and H. J. Puschmann, *J. Appl. Crystallogr.*, 2009, **42**, 339–341.
4. G. M. Sheldrick, *Acta Crystallogr. Sect. C Struct. Chem.*, 2015, **71**, 3–8.
5. G. M. Sheldrick, *Acta Crystallogr. Sect. A Found. Crystallogr.*, 2008, **64**, 112–122.
6. M. R. Probert, J. A. Coome, A. E. Goeta and J. A. K. Howard, *Sect. A: Found. Crystallogr.*, 2011, **67**, 528.
7. T. Schulz, K. Meindl, D. Leusser, D. Stern, J. Graf, C. Michaelsen, M. Ruf, G. M. Sheldrick and D. Stalke, *J. Appl. Crystallogr.*, 2009, **42**, 885–891.
8. APEX2, version 1.08, Bruker AXS Inc., Madison, WI, 2004.
9. SAINT, Bruker AXS Inc., Madison, WI, 2007.
